# Supplementary material for: Association between lung cancer risk and inorganic arsenic concentration in drinking water: a dose–response meta-analysis
Source: Royal Society of Chemistry journal article supplement (doi:10.1039/c8tx00177d), 2018-01-01

## Supplements

Figure S1 Analysis of the potential lung cancer risks at low to moderate arsenic concentrations.

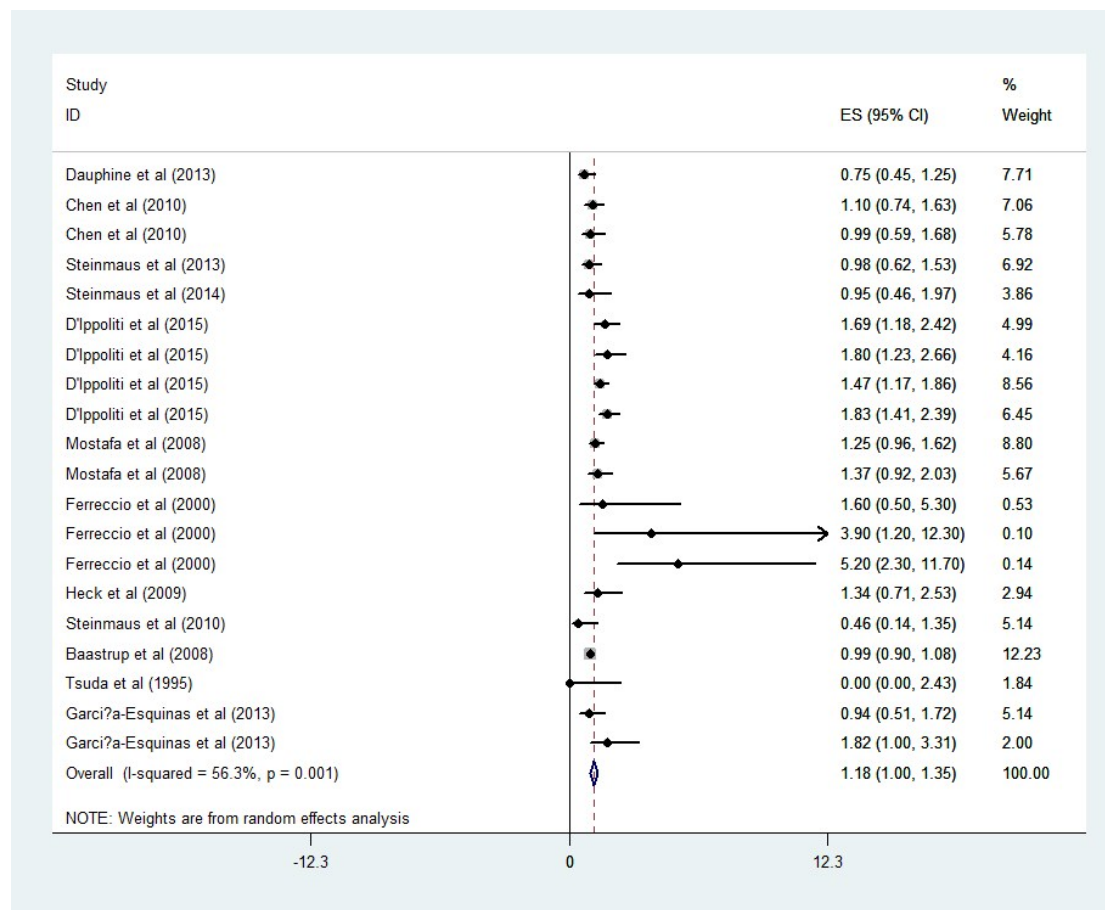

Supplement: c8tx00177d1.pdf [file c8tx00177d1.pdf]
